# Supplementary material for: A Global Approach for Quantitative Super Resolution and Electron Microscopy on Cryo and Epoxy Sections Using Self-labeling Protein Tags
Source: Springer Nature journal article supplement (doi:10.1038/s41598-017-00033-x), 2017-02-01
Supplement: MOESM1 [file 41598_2017_33_MOESM1_ESM.pdf › 41598_2017_33_MOESM1_ESM.pdf]

## Supplementary Information

### **A Global Approach for Quantitative Super Resolution and Electron Microscopy on Cryo and Epoxy Sections Using Self-labeling Protein Tags**

Andreas Müller<sup>1, 2</sup>, Martin Neukam<sup>1, 2</sup>, Anna Ivanova<sup>1, 2</sup>, Anke Sönmez<sup>1, 2</sup>, Carla Münster<sup>1, 2</sup>, Susanne Kretschmar<sup>3, 4</sup>, Yannis Kalaidzidis<sup>5, 6</sup>, Thomas Kurth<sup>3, 4</sup>, Jean-Marc Verbavatz<sup>5, 7</sup>, Michele Solimena<sup>1, 2, 5</sup>

<sup>1</sup>Molecular Diabetology, University Hospital and Faculty of Medicine Carl Gustav Carus, TU Dresden, Dresden, Germany

<sup>2</sup>Paul Langerhans Institute Dresden (PLID) of the Helmholtz Center Munich at the University Hospital Carl Gustav Carus and Faculty of Medicine of the TU Dresden, Dresden, Germany

<sup>3</sup>Center for Regenerative Therapies Dresden (CRTD), TU Dresden, Dresden, Germany

<sup>4</sup>Biotechnology Center of the TU Dresden (BIOTEC), Dresden, Germany

<sup>5</sup>Max Planck Institute of Molecular Cell Biology and Genetics (MPI-CBG), Dresden, Germany

<sup>6</sup>Faculty of Bioengineering and Bioinformatics, Moscow State University, Moscow, Russia

<sup>7</sup>Institut Jacques Monod, Université Paris Diderot, Paris, France

\*Corresponding author. Tel.: +49-351-796-366-11; E-mail: [Michele.Solimena@tu-dresden.de](mailto:Michele.Solimena@tu-dresden.de)

## Supplementary Figures

a

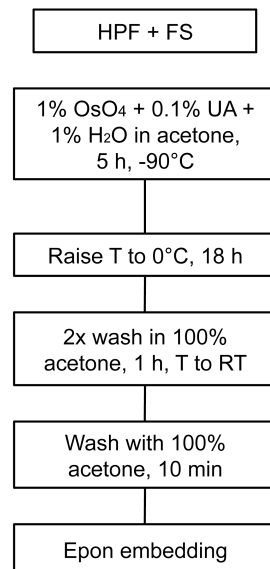

b

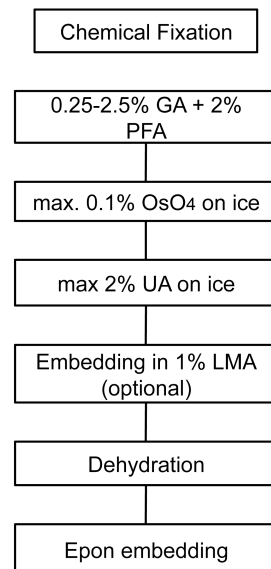

**Figure S1: Protocols for Epon CLEM**

a: HPF + FS protocol for preservation of CLIP- and SNAP-fluorescence.

b: Chemical fixation protocol for preservation of CLIP- and SNAP-fluorescence

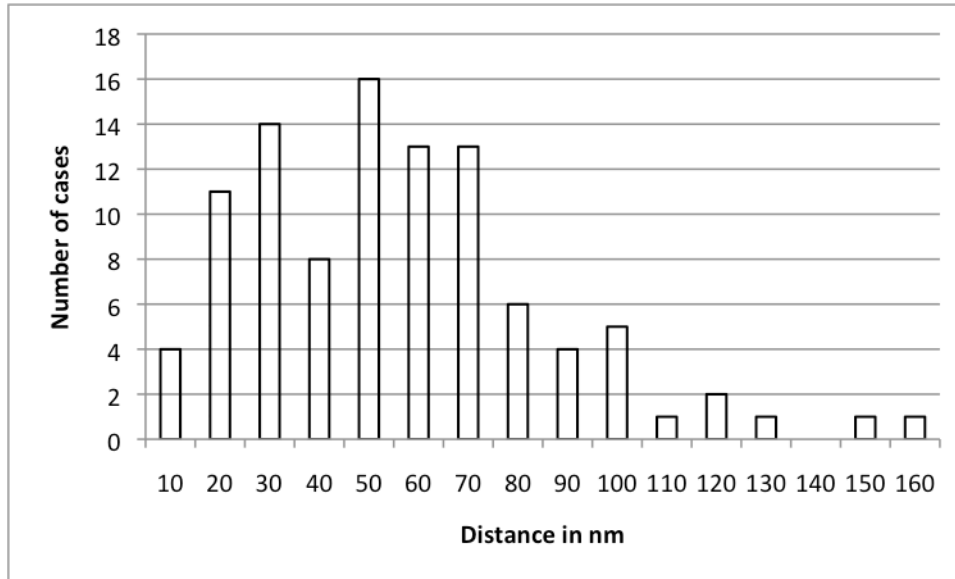

**Figure S2: Shift of correlation between SIM and corresponding EM SGs**

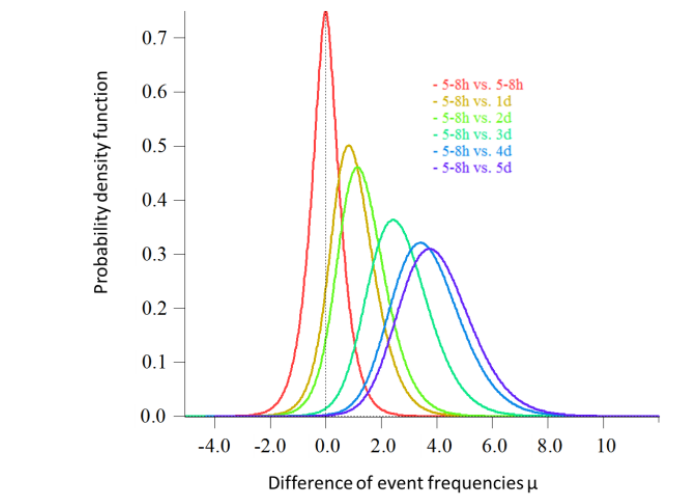

**Figure S3: Probability distribution for the difference of frequencies of MGBs positive for 505+ (5-8 h compared to other SG ages)**

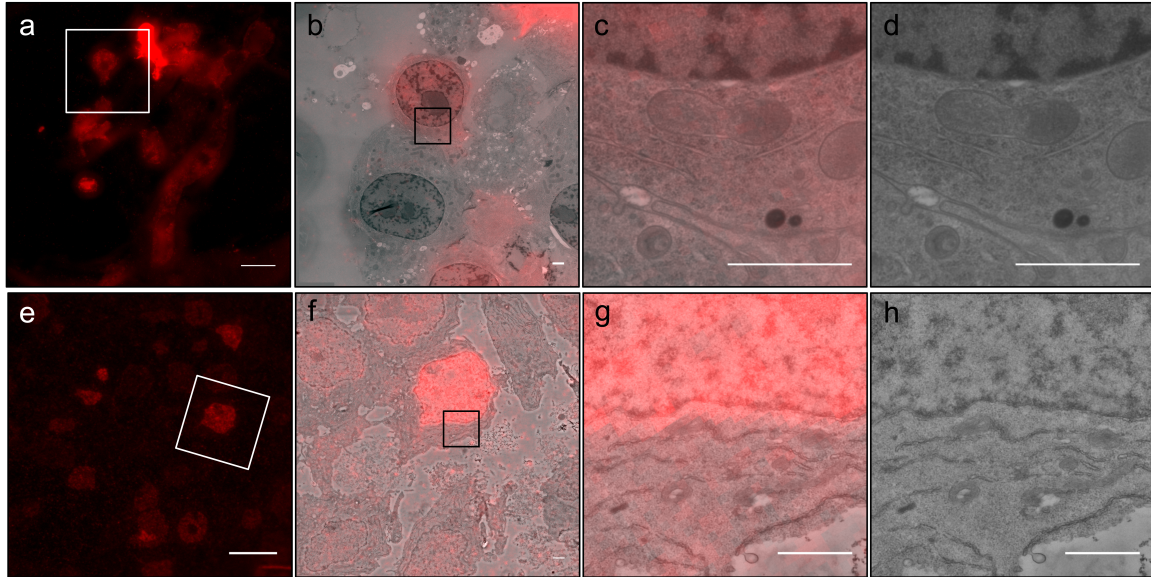

**Figure S4: CLEM in Epon after HPF + FS and after chemical fixation**

a-d: SNAP-CCF. a: Wide-field FLM image of Epon section of INS-1 cells with TMR+ ICA512-CCF-SNAP showing cytosolic and nuclear labeling. b: CLEM image corresponding to the boxed area in a allowing to discriminate labeled from unlabeled cells. c: CLEM detail corresponding to the boxed area in c. d: TEM detail showing nucleus, cell membrane and insulin SGs.

e-h: H2B-CLIP. e: Wide-field FLM image of an Epon section of INS-1 cells with TMR+ H2B-CLIP. f: CLEM image corresponding to the boxed area in e with TMR+ signal localized in cell nucleus. g: CLEM detail corresponding to the boxed area in f. h: TEM detail with well contrasted membranes.



a

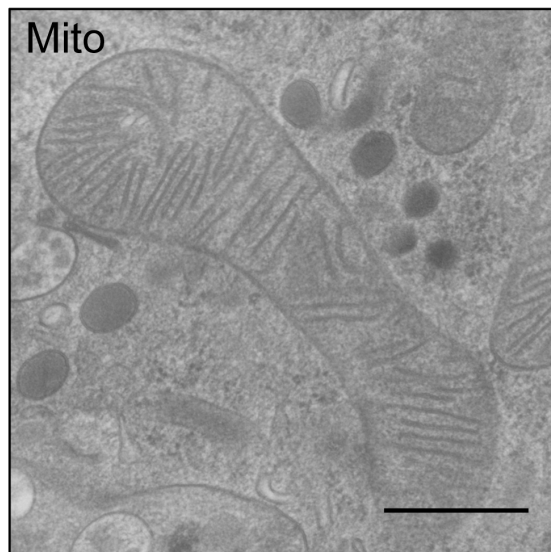

b

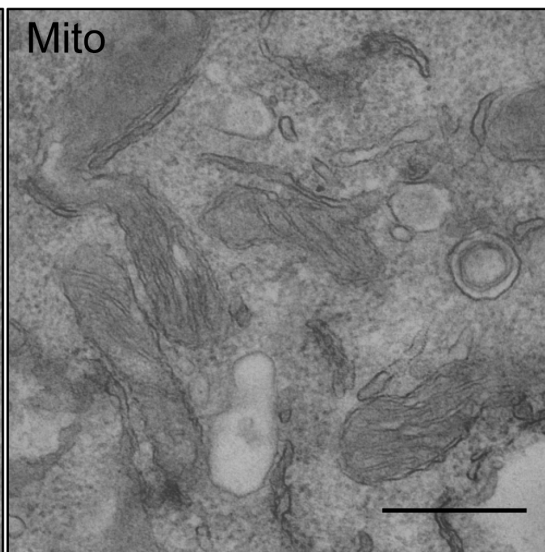

Golgi

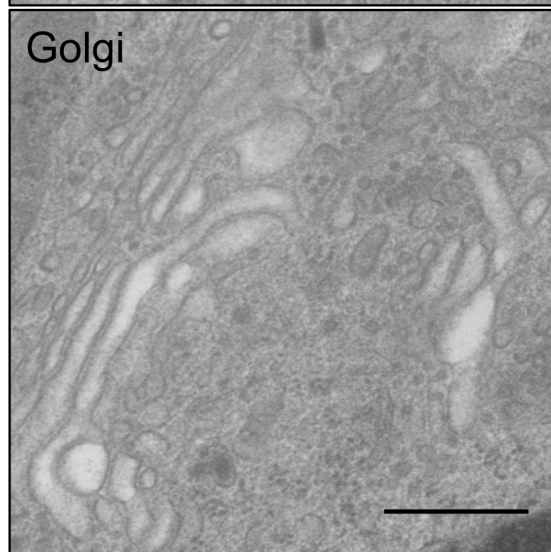

Golgi

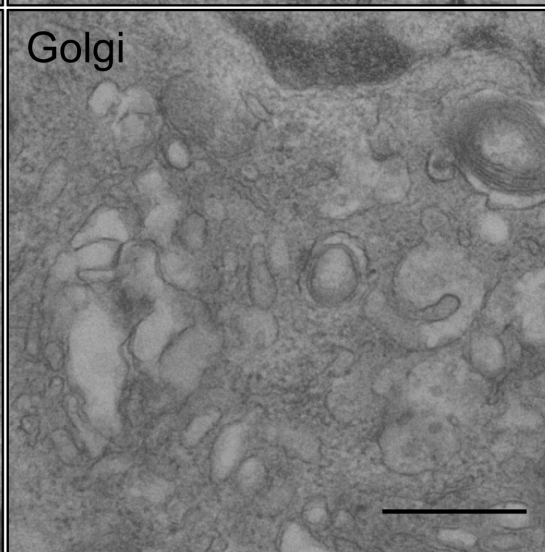

PM

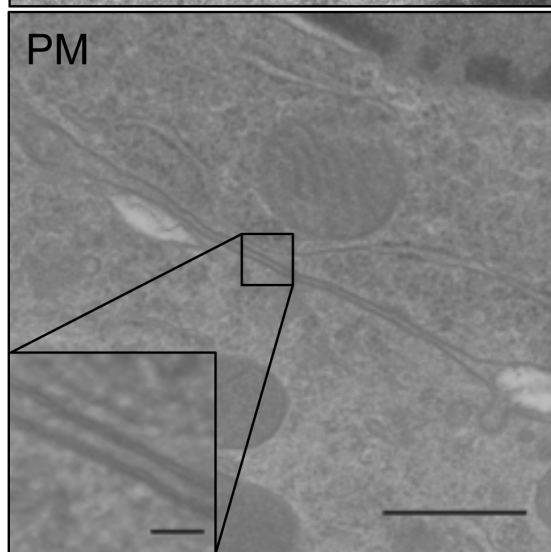

PM

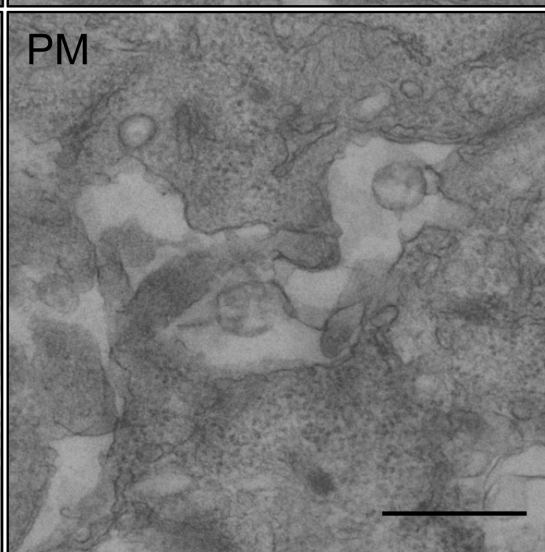

**Figure S5: Examples of ultrastructural features in Epon sections used for CLEM.**

a: after HPF and FS, b: after chemical fixation, Mito: Mitochondria, PM: Plasma membrane. Inset in a: PM is showing detail of lipid bilayers of 2 cell membranes. Scale bars: 500 nm, except for inset: 50 nm.

**Supplementary Tables:**

| SG age | 5-8 h       | 1d          | 2d          | 3d          | 4d          | 5d          |
|--------|-------------|-------------|-------------|-------------|-------------|-------------|
| 5-8 h  |             | 0.383245259 | 0.179982068 | 0.337487824 | 0.003638637 | 0.000767409 |
| 1d     | 0.383245259 |             | 0.327640153 | 0.630431173 | 0.002168858 | 0.000242553 |
| 2d     | 0.179982068 | 0.327640153 |             | 0.674069059 | 0.067445891 | 0.013086835 |
| 3d     | 0.337487824 | 0.630431173 | 0.674069059 |             | 0.036313679 | 0.008038475 |
| 4d     | 0.003638637 | 0.002168858 | 0.067445891 | 0.036313679 |             | 0.02028845  |
| 5d     | 0.000767409 | 0.000242553 | 0.013086835 | 0.008038475 | 0.02028845  |             |

**Table S1: P-values after post-hoc t-tests**

|              | 5-8 h | 1 d | 2 d | 3 d | 4 d | 5 d |
|--------------|-------|-----|-----|-----|-----|-----|
| Experiment 1 | 1     | 1   | 1   | 3   | 4   | 6   |
| Experiment 2 | 0     | 2   | 2   | 4   | 4   | 4   |
| Experiment 3 | 0     | 1   | 2   | 2   | 4   | 3   |

**Table S2: Quantification of 505+ MGBs**

|      | 5-8h    | 1d    | 2d    | 3d     | 4d     | 5d      |
|------|---------|-------|-------|--------|--------|---------|
| 5-8h |         | 0.11  | 0.063 | 0.0058 | 0.0009 | 0.00049 |
| 1d   | 0.11    |       | 0.38  | 0.090  | 0.024  | 0.015   |
| 2d   | 0.063   | 0.38  |       | 0.15   | 0.048  | 0.031   |
| 3d   | 0.0058  | 0.090 | 0.15  |        | 0.26   | 0.20    |
| 4d   | 0.0009  | 0.024 | 0.048 | 0.26   |        | 0.42    |
| 5d   | 0.00049 | 0.015 | 0.031 | 0.20   | 0.42   |         |

**Table S3: Statistical analysis of 505+ MGBs**

### Supplementary Methods:

A small number of observed events (MGBs containing age-defined 505+ SG) is described by Poisson statistics. The probability to observe  $n$  events, given the frequency of event  $\lambda$  is:

$$p(n|\lambda) = \frac{\lambda^n}{\Gamma(n+1)} e^{-\lambda}$$

If we repeat the experiment  $M$  times and observe a set of measurements  $n_1, n_2, \dots, n_M \equiv \{n\}$ , then

$$p(\{n\}|\lambda) = \prod_{i=1}^M \frac{\lambda^{n_i}}{\Gamma(n_i+1)} e^{-\lambda}$$

The posterior probability of  $\lambda$  is:

$$p(\lambda|\{n\}) = \frac{p(\lambda) e^{-M\lambda} \lambda^{\sum_{i=1}^M n_i}}{\int_0^{\infty} p(\lambda) e^{-M\lambda} \lambda^{\sum_{i=1}^M n_i} d\lambda} = \frac{1}{Z(\{n\})} p(\lambda) e^{-M\lambda} \lambda^{\sum_{i=1}^M n_i},$$

where  $p(\lambda)$  is the prior probability.

For the comparison of two conditions (e.g. 5-8h vs. 3d), we have two sets of observations  $\{n_1\}$  and  $\{n_2\}$  with unknown frequencies  $\lambda_1$  and  $\lambda_2$ .

Then the probability is  $p(\lambda_1, \lambda_2 | \{n_1\}, \{n_2\}) = \frac{1}{Z} p(\lambda_1) p(\lambda_2) e^{-M\lambda_1} \lambda_1^{N_1} e^{-M\lambda_2} \lambda_2^{N_2}$ , where

$$N_1 = \sum_{i=1}^M n_{1,i}, \quad N_2 = \sum_{i=1}^M n_{2,i}$$

Next, we build a probability distribution for the difference between unknown frequencies

$$\mu = \lambda_2 - \lambda_1.$$

For this we introduce the probability  $p(\mu | \lambda_1, \lambda_2) = \delta(\lambda_2 - \lambda_1 - \mu)$ .

Then from the probability chain rule we have

$$p(\mu, \lambda_1, \lambda_2 | \{n_1\}, \{n_2\}) = p(\mu | \lambda_1, \lambda_2) p(\lambda_1, \lambda_2 | \{n_1\}, \{n_2\})$$

Following the Bayesian approach we sequentially marginalize unknown parameters  $\lambda_1$  and  $\lambda_2$ :

$$p(\mu, \lambda_1 | \{n_1\}, \{n_2\}) = \int_0^{\infty} p(\mu | \lambda_1, \lambda_2) p(\lambda_1, \lambda_2 | \{n_1\}, \{n_2\}) d\lambda_2$$

$$= \frac{1}{Z} p(\lambda_2) p(\lambda_2 - \mu) e^{-M\lambda_2} \lambda_2^{N_2} e^{-M(\lambda_2 - \mu)} (\lambda_2 - \mu)^{N_1}, \text{ where } Z \text{ is the normalization}$$

constant.

For an unbiased estimation we have chosen a improper uniform prior for unknown frequency  $p(\lambda) = \text{const}$

Therefore, we get after marginalization:

$$p(\mu | \{n_1\}, \{n_2\}) = \frac{1}{Z} \int_{\max(\mu, 0)}^{\infty} e^{-M\lambda} \lambda^{N_2} e^{-M(\lambda - \mu)} (\lambda - \mu)^{N_1} d\lambda$$

$$= \frac{e^{M\mu}}{Z} \sum_{j=0}^{N_1} \frac{\Gamma(N_1 + 1) (\Gamma(N_2 + N_1 - j + 1) - \Gamma(N_2 + N_1 - j + 1, \max(0, 2M\mu)))}{\Gamma(N_1 - j + 1) \Gamma(j + 1)} (-2M\mu)^j$$

Finally, the probability distribution is :

$$p(\mu | \{n_1\}, \{n_2\}) = \frac{e^{M\mu} \sum_{j=0}^{N_1} \frac{(\Gamma(N_2 + N_1 - j + 1) - \Gamma(N_2 + N_1 - j + 1, \max(0, 2M\mu)))}{\Gamma(N_1 - j + 1) \Gamma(j + 1)} (-2M\mu)^j}{\int_{-\infty}^{\infty} e^{M\mu} \sum_{j=0}^{N_1} \frac{(\Gamma(N_2 + N_1 - j + 1) - \Gamma(N_2 + N_1 - j + 1, \max(0, 2M\mu)))}{\Gamma(N_1 - j + 1) \Gamma(j + 1)} (-2M\mu)^j d\mu}$$

We build probability distribution for difference of frequencies of MGBs positive for 505+ (Supplementary Figure 3).

Then, for every distribution we found the most probable value for the difference of frequencies, 95% confidence interval (excludes 2.5% on both side of distribution) and

one-side p-value for null-hypothesis  $\mu \leq 0 : p_{\text{value}} = \int_{-\infty}^0 p(\mu | \{n_1\}, \{n_2\}) d\mu$

|                            | 5-8h vs. 5-8h | 1d vs. 5-8h   | 2d vs. 5-8h   | 3d vs. 5-8h  | 4d vs. 5-8h  | 5d vs. 5-8h  |
|----------------------------|---------------|---------------|---------------|--------------|--------------|--------------|
| Most probable $\mu$        | 0             | 0.83          | 1.14          | 2.43         | 3.41         | 3.74         |
| Confidence interval (95 %) | [-1.37, 1.38] | [-0.64, 2.92] | [-0.39, 3.39] | [0.60, 5.18] | [1.36, 6.46] | [1.62, 6.88] |
| p-value                    | 0.5           | 0.11          | 0.063         | 0.0058       | 0.0009       | 0.00049      |

The same calculation was done relative to day 1 and the other SG ages (not shown):

|                            | 1d vs. 1d     | 2d vs. 1d     | 3d vs. 1d     | 4d vs. 1d    | 5d vs. 1d    |
|----------------------------|---------------|---------------|---------------|--------------|--------------|
| Most probable $\mu$        | 0             | 0.3           | 1.54          | 3.41         | 3.74         |
| Confidence interval (95 %) | [-1.28, 2.01] | [-1.85, 2.59] | [-0.79, 4.35] | [0.01, 5.63] | [0.28, 6.04] |
| p-value                    | 0.5           | 0.37          | 0.090         | 0.024        | 0.015        |

## Supplementary Movies

### Movie S1: Tomogram of LC3-CLIP TMR+ and hIns-SNAP 505+ INS-1 cell

Scale bar: 500 nm

### Movie S2: Tomogram of LC3-CLIP TMR+ and hIns-SNAP 505+ INS-1 cell with SG fusing with autophagosome

Scale bar: 500 nm

### Movie S3: Tomogram of LifeAct-CLIP TMR+ INS-1 cell

Scale bar: 500 nm
